# Supplementary material for: Saponins from Panax japonicus ameliorate age-related renal fibrosis by inhibition of inflammation mediated by NF-κB and TGF-β1/Smad signaling and suppression of oxidative stress via activation of Nrf2-ARE signaling
Source: PubMed Central journal article supplement — J Ginseng Res. 2020 Sep 9;45(3):408–19. doi: 10.1016/j.jgr.2020.08.005 (PMC8134850; doi:10.1016/j.jgr.2020.08.005), 2020-09-09
Supplement: mmc1.pdf [file mmc1.pdf]

## Supplementary figure

TGF- $\beta$ 1 signaling Pathway

NF- $\kappa$ B signaling Pathway

Nrf2/ARE signaling Pathway

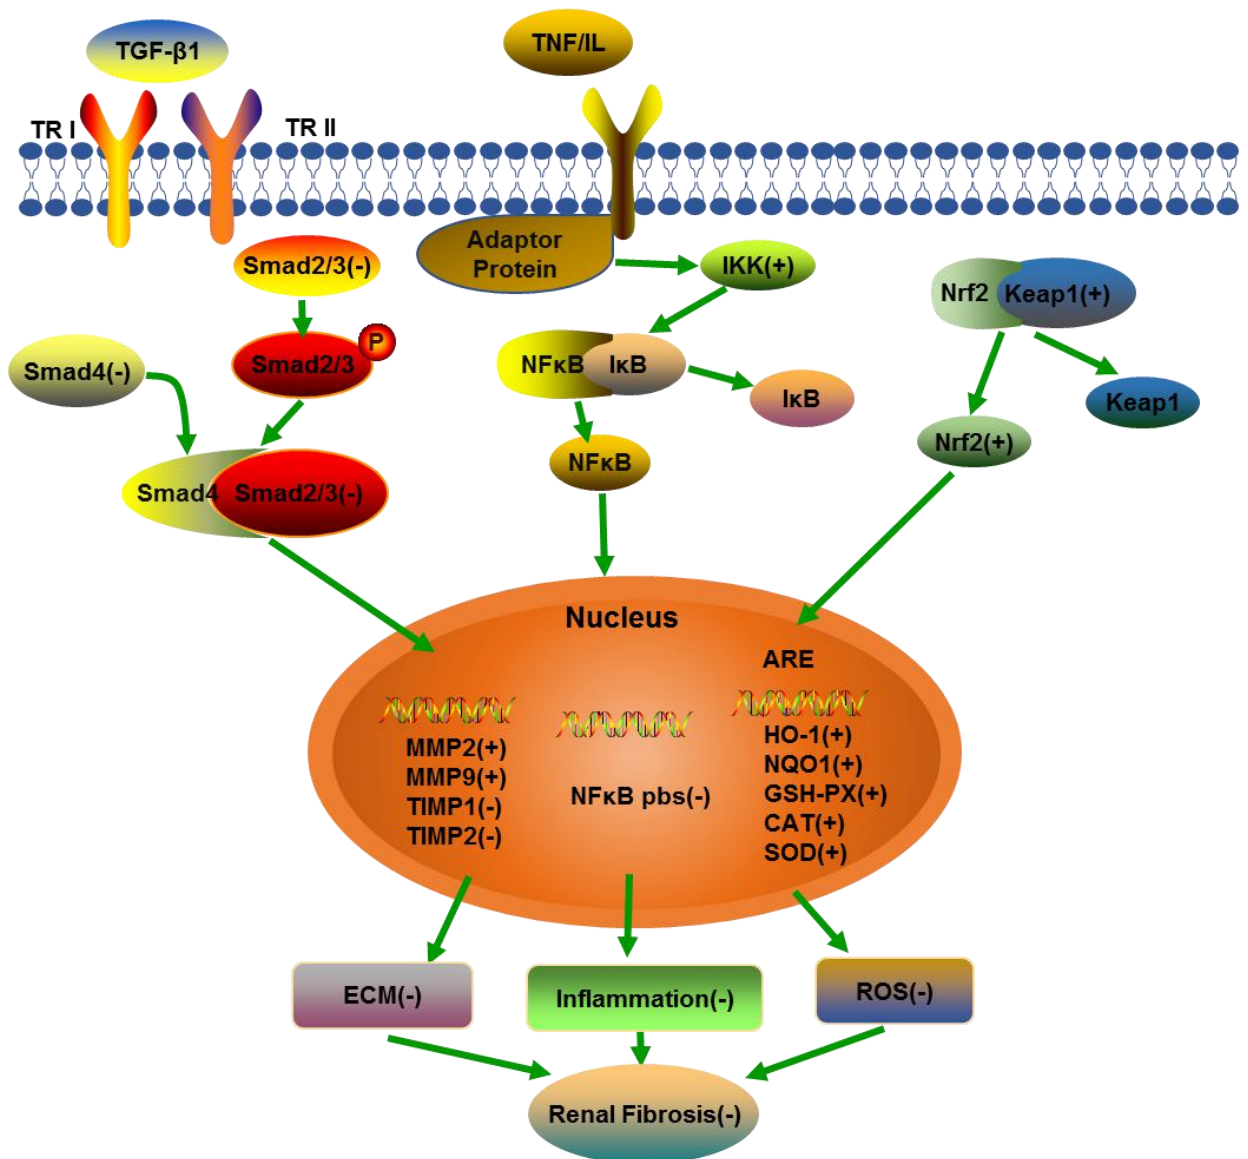

Schematic illustration for summary of the regulatory effects of SPJs on TGF- $\beta$ 1/Smad signaling, NF $\kappa$ B signaling and Nrf2-ARE signaling pathway. (+): positive effect, (-): negative effect.
