# Supplementary material for: Saponins from Panax japonicus ameliorate age-related renal fibrosis by inhibition of inflammation mediated by NF-κB and TGF-β1/Smad signaling and suppression of oxidative stress via activation of Nrf2-ARE signaling
Source: PubMed Central journal article supplement — J Ginseng Res. 2020 Sep 9;45(3):408–19. doi: 10.1016/j.jgr.2020.08.005 (PMC8134850; doi:10.1016/j.jgr.2020.08.005), 2020-09-09
Supplement: mmc2.pdf [file mmc2.pdf]

**Supplementary table The primer sequences used for real-time PCR**

| Gene           | Forward primer          | Reverse primer            |
|----------------|-------------------------|---------------------------|
| Nrf2           | gacctaaagcacagccaacacat | ctcaatcggcttgaatgtttgtc   |
| TGF- $\beta$ 1 | tgcgcttgagagattaaaa     | agccctgtattccgtctct       |
| Smad2          | aacccgaatgtgcaccataagaa | gcgagtctttgatgggtttacga   |
| Smad3          | cccagagcaatattccaga     | tgtgaagcgtggaatgtctc      |
| Smad4          | aaggcctagcaccaccttag    | agccttaaactctgacctgt      |
| HO-1           | tgtcccaggattgtccgag     | actgggttctgctgtttcgt      |
| NQO1           | ggggacatgaacgtcattctct  | agtggtgactcctcccagacag    |
| TIMP1          | gggcttcaccaagacctca     | gaagaaagatgggagtggg       |
| TIMP2          | ccaaagcggtcagtgaga      | tggtgcccggtgatgttc        |
| MMP2           | acctggatgccgtcgtggac    | tgtggcagcaccagggcagc      |
| MMP9           | cgtgggcttagatcattcc     | ttgtcggcgataaggaagg       |
| Fibronectin    | gactcgtttgacttcaccac    | tccttctcgtcagttcgt        |
| Collagen I     | actcagccgtctgtgcctca    | ggaggcctcggtaggacatta     |
| Collagen III   | aagggcaggggaacaactgat   | gtgaagcagggtgagaagaaac    |
| Collagen IV    | ccgggatttactggaccacc    | cccttgctctcccttgta        |
| TNF- $\alpha$  | tgctctgtgagcgcactgg     | gggctctgaggagtagacgataaag |
| IL-1 $\beta$   | ggaaacagcaatggtcggg     | gacttggcagaggacaaaggc     |
| IL-6           | caactccaatgctctcctaattg | tgccgagtagacctcatagtacc   |
| GAPDH          | aacttggcattgtggaagg     | acacattggggtaggaaca       |
